# Supplementary material for: Molecular Characterization, Expression, and Regulatory Signal Pathway Analysis of Inflammasome Component Apoptosis-Associated Speck-like Protein Containing a CARD Domain (ASC) in Large Yellow Croaker (Larimichthys crocea)
Source: MDPI journal article supplement (doi:10.3390/ijms24032175), 2023-01-22
Supplement: s1 [file s1]

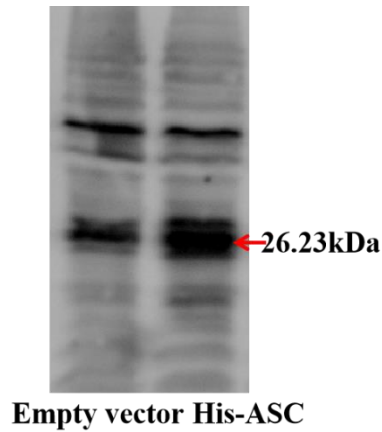

**Figure S1.** The exogenous expression of LcASC protein in large yellow croaker kidney cells confirmed by Western blot using anti-His antibody.

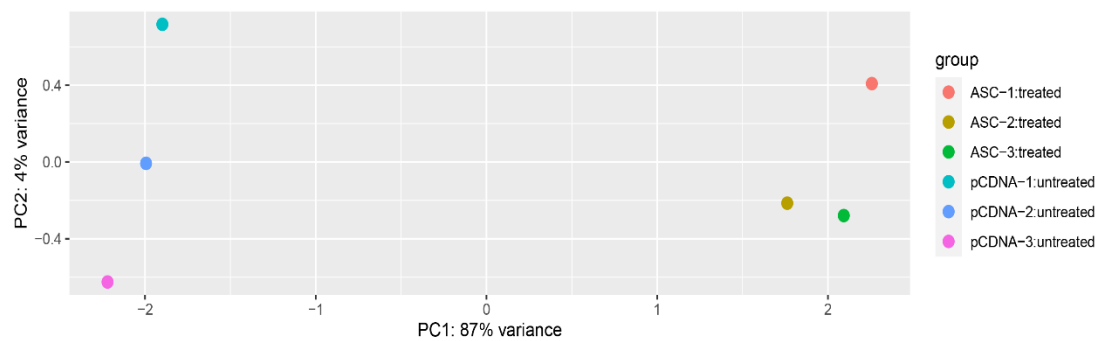

**Figure S2.** The PCA analysis of all surveyed samples.

**Table S1.** Primers used for ASC cDNA identification and gene expression.

| Primer   | Sequence (5'-3')                                  | Purpose                  |
|----------|---------------------------------------------------|--------------------------|
| cASC-F   | ATGGCCCCCAAACAAAAAG                               | Gene identification      |
| cASC-R   | TTTTTTATTCTTGATGTCGTCATG                          |                          |
| qASC-F   | CCCCCAAACAAAAAGAAGGTG                             |                          |
| qASC-R   | CTTTTATCCTTCACCATGGCG                             | qPCR                     |
| βactin-F | TTATGAAGGCTATGCCCTGCC                             |                          |
| βactin-R | TGAAGGAGTAGCCACGCTCTGT                            |                          |
| sASC-F   | CtaccggactcagatctcgagATGGCCCCCAA<br>AACAAAAAG     | Subcellular localization |
| sASC-R   | GtaccgtcgactgcagaattcTTTTTTATTCTTG<br>ATGTCGTCATG |                          |
| oASC-F   | CctctagactcgagcgccgcATGGCCCCCAA<br>ACAAAAAG       |                          |
| oASC-R   | TagtccagtgtggtggaattcTTTTTTATTCTTG<br>ATGTCGTCATG | Over expression          |

**Table S2.** Differently expressed genes between ASC overexpression and control cells.

| GeneID    | baseMean | log <sub>2</sub> FoldChange | lfcSE    | stat     | pvalue   | padj     |
|-----------|----------|-----------------------------|----------|----------|----------|----------|
| KIAA0754  | 66.40229 | 2.575797                    | 0.301724 | 8.536926 | 1.38E-17 | 4.20E-15 |
| POMK      | 93.01342 | 1.761321                    | 0.241924 | 7.280481 | 3.33E-13 | 4.82E-11 |
| NCR3LG1   | 394.1375 | 1.522483                    | 0.114191 | 13.33278 | 1.49E-40 | 8.65E-37 |
| FOS       | 110.2471 | 1.21052                     | 0.210085 | 5.762042 | 8.31E-09 | 4.91E-07 |
| TSIX      | 139.6885 | 1.1931                      | 0.175151 | 6.81183  | 9.64E-12 | 9.97E-10 |
| SLC2A3    | 546.8132 | 1.153975                    | 0.087924 | 13.12471 | 2.38E-39 | 9.18E-36 |
| LBH       | 142.5221 | 1.077569                    | 0.191819 | 5.617622 | 1.94E-08 | 1.02E-06 |
| XIST      | 14754.1  | 0.988873                    | 0.067755 | 14.59479 | 3.03E-48 | 3.51E-44 |
| MAFB      | 95.00339 | 0.936685                    | 0.217955 | 4.2976   | 1.73E-05 | 0.00037  |
| GEM       | 119.0044 | 0.911408                    | 0.191778 | 4.752409 | 2.01E-06 | 6.00E-05 |
| SYT2      | 89.84213 | 0.893659                    | 0.217715 | 4.104723 | 4.05E-05 | 0.000734 |
| SEMA6B    | 129.4587 | 0.843701                    | 0.177921 | 4.742006 | 2.12E-06 | 6.27E-05 |
| BHLHE40   | 980.463  | 0.841318                    | 0.075729 | 11.10955 | 1.13E-28 | 1.19E-25 |
| ARRDC4    | 396.5321 | 0.792961                    | 0.109546 | 7.238585 | 4.53E-13 | 6.40E-11 |
| NDRG1     | 1120.804 | 0.770508                    | 0.075006 | 10.27266 | 9.36E-25 | 6.38E-22 |
| MFSD4B    | 205.2744 | 0.760713                    | 0.166033 | 4.581688 | 4.61E-06 | 0.000119 |
| SAT1      | 232.3796 | 0.756776                    | 0.135847 | 5.570786 | 2.54E-08 | 1.32E-06 |
| RNF169    | 773.6177 | 0.752826                    | 0.074929 | 10.0472  | 9.45E-24 | 5.48E-21 |
| EGR1      | 136.1017 | 0.731437                    | 0.176253 | 4.149935 | 3.33E-05 | 0.000624 |
| PLEKHM1P1 | 162.1855 | 0.727663                    | 0.161959 | 4.492881 | 7.03E-06 | 0.000169 |
| SULF1     | 624.6119 | 0.70592                     | 0.097541 | 7.237182 | 4.58E-13 | 6.40E-11 |
| USP37     | 498.4564 | 0.701755                    | 0.095065 | 7.381857 | 1.56E-13 | 2.32E-11 |
| AHNAK     | 1264.461 | 0.678233                    | 0.058185 | 11.65657 | 2.12E-31 | 2.74E-28 |
| MED12L    | 198.5478 | 0.654666                    | 0.148421 | 4.410874 | 1.03E-05 | 0.000231 |
| ZC3H6     | 220.952  | 0.651329                    | 0.144934 | 4.493976 | 6.99E-06 | 0.000168 |
| DNHD1     | 731.569  | 0.649253                    | 0.076652 | 8.470111 | 2.45E-17 | 7.10E-15 |
| AHNAK2    | 244.2486 | 0.613215                    | 0.133164 | 4.604971 | 4.13E-06 | 0.000109 |
| EOLA1     | 564.2075 | 0.605084                    | 0.094305 | 6.416279 | 1.40E-10 | 1.16E-08 |
| HEG1      | 455.3894 | 0.595556                    | 0.09555  | 6.23295  | 4.58E-10 | 3.47E-08 |
| OSTN      | 731.8564 | 0.592394                    | 0.077159 | 7.677616 | 1.62E-14 | 2.80E-12 |
| CPEB2     | 267.4966 | 0.587332                    | 0.125794 | 4.669005 | 3.03E-06 | 8.34E-05 |
| EGFR      | 351.5324 | 0.577759                    | 0.117019 | 4.937311 | 7.92E-07 | 2.68E-05 |
| ADAMTS1   | 2776.272 | 0.577173                    | 0.045331 | 12.73229 | 3.91E-37 | 9.07E-34 |
| GPR50     | 363.4001 | 0.563776                    | 0.122966 | 4.584824 | 4.54E-06 | 0.000118 |
| TENM1     | 2022.592 | 0.56237                     | 0.062328 | 9.022723 | 1.83E-19 | 6.64E-17 |
| HERC2     | 545.9844 | 0.555566                    | 0.093224 | 5.959487 | 2.53E-09 | 1.67E-07 |
| KIF5C     | 290.1017 | 0.548832                    | 0.119145 | 4.606402 | 4.10E-06 | 0.000108 |
| HMOX1     | 788.7589 | 0.540671                    | 0.093803 | 5.763908 | 8.22E-09 | 4.88E-07 |
| INSIG1    | 2815.258 | 0.534416                    | 0.048154 | 11.098   | 1.28E-28 | 1.24E-25 |
| KLHL24    | 345.3    | 0.529627                    | 0.112222 | 4.719454 | 2.36E-06 | 6.77E-05 |
| PLEKHH2   | 286.2567 | 0.526425                    | 0.123927 | 4.247876 | 2.16E-05 | 0.000443 |
| TSC22D3   | 4102.144 | 0.523403                    | 0.043183 | 12.12046 | 8.23E-34 | 1.19E-30 |
| DDR2      | 2244.403 | 0.520231                    | 0.044789 | 11.61511 | 3.45E-31 | 4.00E-28 |
| NEAT1     | 2495.875 | 0.514695                    | 0.054571 | 9.431748 | 4.03E-21 | 1.95E-18 |
| DOK3      | 329.3064 | -0.58951                    | 0.11167  | -5.27905 | 1.30E-07 | 5.59E-06 |
| RNA28SN5  | 247.6619 | -0.72932                    | 0.15172  | -4.807   | 1.53E-06 | 4.75E-05 |

**TableS3.** Enriched genes in each pathway.

| ID       | Description                                            | GeneRatio | p.adjust | qvalue | geneID                 |
|----------|--------------------------------------------------------|-----------|----------|--------|------------------------|
| hsa04928 | Parathyroid hormone synthesis, secretion and action    | 4/22      | 0.0186   | 0.0163 | EGFR/EGR1/MAFB/FOS     |
| hsa01522 | Endocrine resistance                                   | 3/22      | 0.1236   | 0.1078 | EGFR/NOTCH2/FOS        |
| hsa05132 | Salmonella infection                                   | 4/22      | 0.1498   | 0.1307 | AHNAK/KIF5C/AHNAK2/FOS |
| hsa04216 | Ferroptosis                                            | 2/22      | 0.1498   | 0.1307 | HMOX1/SAT1             |
| hsa05224 | Breast cancer                                          | 3/22      | 0.1547   | 0.1350 | EGFR/NOTCH2/FOS        |
| hsa05223 | Non-small cell lung cancer                             | 2/22      | 0.2346   | 0.2047 | EGFR/KIF5C             |
| hsa05207 | Chemical carcinogenesis - receptor activation          | 3/22      | 0.2346   | 0.2047 | EGFR/NOTCH2/FOS        |
| hsa05208 | Chemical carcinogenesis - reactive oxygen species      | 3/22      | 0.2346   | 0.2047 | EGFR/HMOX1/FOS         |
| hsa05210 | Colorectal cancer                                      | 2/22      | 0.2346   | 0.2047 | EGFR/FOS               |
| hsa05235 | PD-L1 expression and PD-1 checkpoint pathway in cancer | 2/22      | 0.2346   | 0.2047 | EGFR/FOS               |
| hsa04658 | Th1 and Th2 cell differentiation                       | 2/22      | 0.2346   | 0.2047 | NOTCH2/FOS             |
| hsa04912 | GnRH signaling pathway                                 | 2/22      | 0.2346   | 0.2047 | EGFR/EGR1              |
| hsa05231 | Choline metabolism in cancer                           | 2/22      | 0.2346   | 0.2047 | EGFR/FOS               |
| hsa04933 | AGE-RAGE signaling pathway in diabetic complications   | 2/22      | 0.2346   | 0.2047 | FN1/EGR1               |
| hsa04066 | HIF-1 signaling pathway                                | 2/22      | 0.2566   | 0.2239 | EGFR/HMOX1             |
| hsa04919 | Thyroid hormone signaling pathway                      | 2/22      | 0.2715   | 0.2369 | NOTCH2/MED12L          |
| hsa04926 | Relaxin signaling pathway                              | 2/22      | 0.2715   | 0.2369 | EGFR/FOS               |
| hsa04728 | Dopaminergic synapse                                   | 2/22      | 0.2715   | 0.2369 | KIF5C/FOS              |
| hsa05206 | MicroRNAs in cancer                                    | 3/22      | 0.2715   | 0.2369 | EGFR/HMOX1/NOTCH2      |
